# Supplementary material
Source: PubMed Central journal article supplement (PMC2527872)
Supplement: 0805868105_0805868105SI.pdf [file 0805868105_0805868105SI.pdf]

# Supporting Information

Schweidenback and Baker 10.1073/pnas.0805868105

| Insertion Site of Mu Left End<br>(in base pairs along Arc target plasmid) | Number of Observed insertions at this site into Arc target | Number of Observed insertions at this site into non-Arc target | Target DNA Sequence At insertion Sites       |
|---------------------------------------------------------------------------|------------------------------------------------------------|----------------------------------------------------------------|----------------------------------------------|
| 410                                                                       | 6                                                          | 0                                                              | 5' gtggt↓acggt gaaaa<br>caca tgcca↑ctttt '5  |
| 465                                                                       | 3                                                          | 0                                                              | 5' ttcgt↓ctcag ccaat<br>aagca gagtc↑ggtta '5 |
| 517                                                                       | 2                                                          | 0                                                              | 5' ccaat↓atgga caact<br>ggta tacct↑gttga '5  |
| 580                                                                       | 2                                                          | 1                                                              | 5' aggtg↓ctgat gccgc<br>tccac gacta↑cggcg '5 |
| 912                                                                       | 1                                                          | 2                                                              | 5' gtttg↓ctcag gctct<br>caaac gagtc↑cgaga '5 |
| 958                                                                       | 0                                                          | 2                                                              | 5' attta↓ttctg cctcc<br>taaat aagac↑ggagg '5 |
| 974                                                                       | 1                                                          | 3                                                              | 5' agagc↓ctgat aaaaa<br>tctcg gacta↑ttttt '5 |

**Fig. S1.** Nucleotide sequences of several of the Mu transposition target sites represented in Fig. 5B. The target sites were cloned from PCR-amplified donor–target joints from *in vitro* transposition reactions containing FP<sub>WT</sub>-ADP and either pCS14 (non-Arc) or pCS15 (Arc) target plasmid. The insertion site of the Mu left end is marked with a red arrow. The presumed insertion site of the Mu right end is marked with blue arrow. Many of the sites were obtained from multiple different clones.
